# Supplementary material for: Identification of biomarkers of immune checkpoint blockade efficacy in recurrent or refractory solid tumor malignancies
Source: PubMed Central journal article supplement (PMC7021232; doi:10.18632/oncotarget.27466), 2020-02-11
Supplement: oncotarget-11-600-s001.pdf [file oncotarget-11-600-s001.pdf]

# Identification of biomarkers of immune checkpoint blockade efficacy in recurrent or refractory solid tumor malignancies

## SUPPLEMENTARY MATERIALS

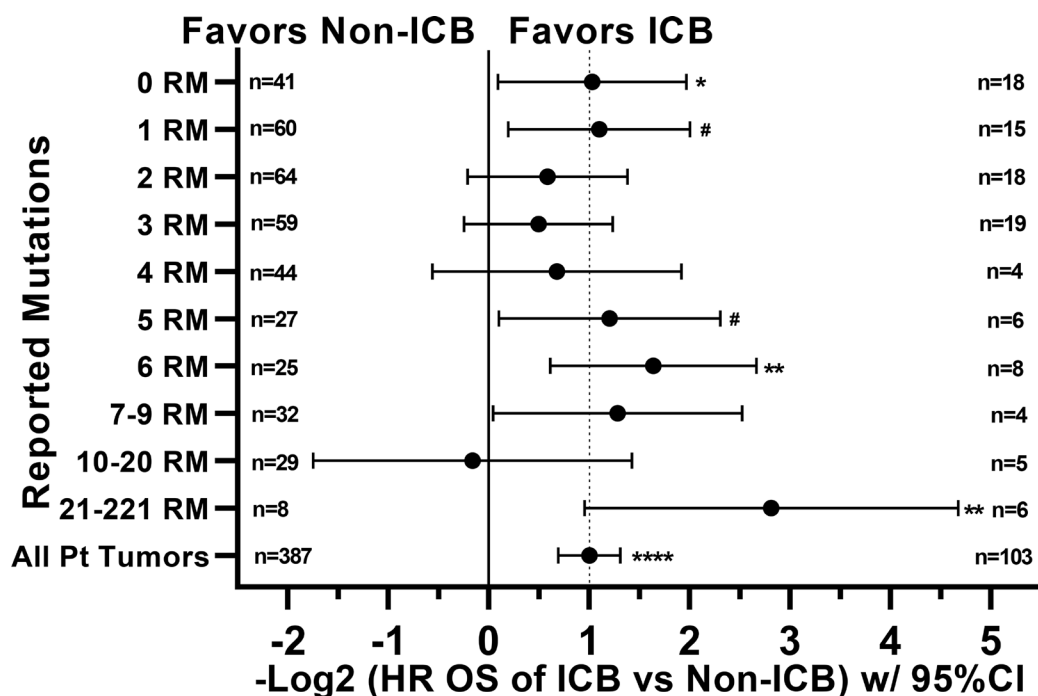

**Supplementary Figure 1: Patients with high TMB benefit most from ICB versus non-ICB treatment.** HRs are  $-\text{Log}_2$  transformed so that a HR of 2 equals 1.0 and a HR of 0.5 equals -1.0. \*\*\*\* $p$ -value < 0.0001; \*\*\* $p$ -value < 0.001; \*\* $p$ -value < 0.01, \* $p$ -value < 0.05, # $p$ -value < 0.10. In the above chart, each RM (reported mutations) is equivalent to 0.573/Mb worth of tumor mutation burden (TMB). For example, two (2) RMs (reported mutations) is equivalent to 1.146/Mb of TMB, 10 RMs (reported mutations) is equivalent to 5.73/Mb of TMB, 100 RMs (reported mutations) is equivalent to 57.3/Mb of TMB, et cetera. Since response to ICB was interrogated in these relationships, only the 490 treated patients were included in this analysis.

**Supplementary Table 1: Patient characteristics.** See Supplementary Table 1

**Supplementary Table 2: Patient characteristics expressed as percentages (%).** See Supplementary Table 2

**Supplementary Table 3: Reported mutation to tumor mutational burden (TMB) conversion chart**

| <b>Reported Mutations</b> | <b>Footprint</b> | <b>TMB (mutations /Mb)</b> |
|---------------------------|------------------|----------------------------|
| 1 RM                      | 1.745 MB         | 0.573                      |
| 2 RM                      | 1.745 MB         | 1.146                      |
| 3 RM                      | 1.745 MB         | 1.719                      |
| 4 RM                      | 1.745 MB         | 2.292                      |
| 5 RM                      | 1.745 MB         | 2.865                      |
| 6 RM                      | 1.745 MB         | 3.438                      |
| 7 RM                      | 1.745 MB         | 4.011                      |
| 8 RM                      | 1.745 MB         | 4.585                      |
| 9 RM                      | 1.745 MB         | 5.158                      |
| 10 RM                     | 1.745 MB         | 5.731                      |
| 11 RM                     | 1.745 MB         | 6.304                      |
| 12 RM                     | 1.745 MB         | 6.877                      |
| 13 RM                     | 1.745 MB         | 7.450                      |
| 14 RM                     | 1.745 MB         | 8.023                      |
| 15 RM                     | 1.745 MB         | 8.596                      |
| 16 RM                     | 1.745 MB         | 9.169                      |
| 17 RM                     | 1.745 MB         | 9.742                      |
| 18 RM                     | 1.745 MB         | 10.315                     |
| 19 RM                     | 1.745 MB         | 10.888                     |
| 20 RM                     | 1.745 MB         | 11.461                     |
| 21 RM                     | 1.745 MB         | 12.034                     |
| 22 RM                     | 1.745 MB         | 12.607                     |
| 25 RM                     | 1.745 MB         | 14.327                     |
| 30 RM                     | 1.745 MB         | 17.192                     |
| 40 RM                     | 1.745 MB         | 22.923                     |
| 50 RM                     | 1.745 MB         | 28.653                     |
| 100 RM                    | 1.745 MB         | 57.307                     |
| 200 RM                    | 1.745 MB         | 114.613                    |
| 500 RM                    | 1.745 MB         | 286.533                    |
| 1000 RM                   | 1.745 MB         | 573.066                    |
